# Supplementary material for: A coumarin-based “turn-on” fluorescent sensor for the determination of Al3+: single crystal X-ray structure and cell staining properties
Source: Royal Society of Chemistry journal article supplement (doi:10.1039/c3dt51045j), 2013-01-01

# Coumarin-based “turn-on” fluorescent sensor for determination of Al<sup>3+</sup>: Single crystal X-ray structure and cell staining properties

Subarna Guha,<sup>a</sup> Sisir Lohar,<sup>a</sup> Animesh Sahana,<sup>a</sup> Arnab Banerjee,<sup>a</sup> Damir A. Safin,<sup>\*b</sup> Maria G. Babashkina,<sup>b</sup> Mariusz P. Mitoraj,<sup>\*c</sup> Michael Bolte,<sup>d</sup> Yann Garcia,<sup>b</sup> Subhra Kanti Mukhopadhyay<sup>e</sup> and Debasis Das<sup>\*a</sup>

<sup>a</sup> Department of Chemistry, The University of Burdwan, Burdwan, 713104, West Bengal, India. Fax: +91 342 2530452; Tel: +91 342 2533913; E-mail: ddas100in@yahoo.com

<sup>b</sup> Institute of Condensed Matter and Nanosciences, MOST - Inorganic Chemistry, Université Catholique de Louvain, Place L. Pasteur 1, 1348 Louvain-la-Neuve, Belgium. Fax: +32(0) 1047 2330; Tel: +32(0) 1047 2831; E-mail: damir.safin@ksu.ru

<sup>c</sup> Department of Theoretical Chemistry, Faculty of Chemistry, Jagiellonian University, R. Ingardena 3, 30-060 Cracow, Poland; E-mail: mitoraj@chemia.uj.edu.pl

<sup>d</sup> Institut für Anorganische Chemie J.-W.-Goethe-Universität, Frankfurt/Main, Germany

<sup>e</sup> Department of Microbiology, The University of Burdwan, Burdwan 713104, India

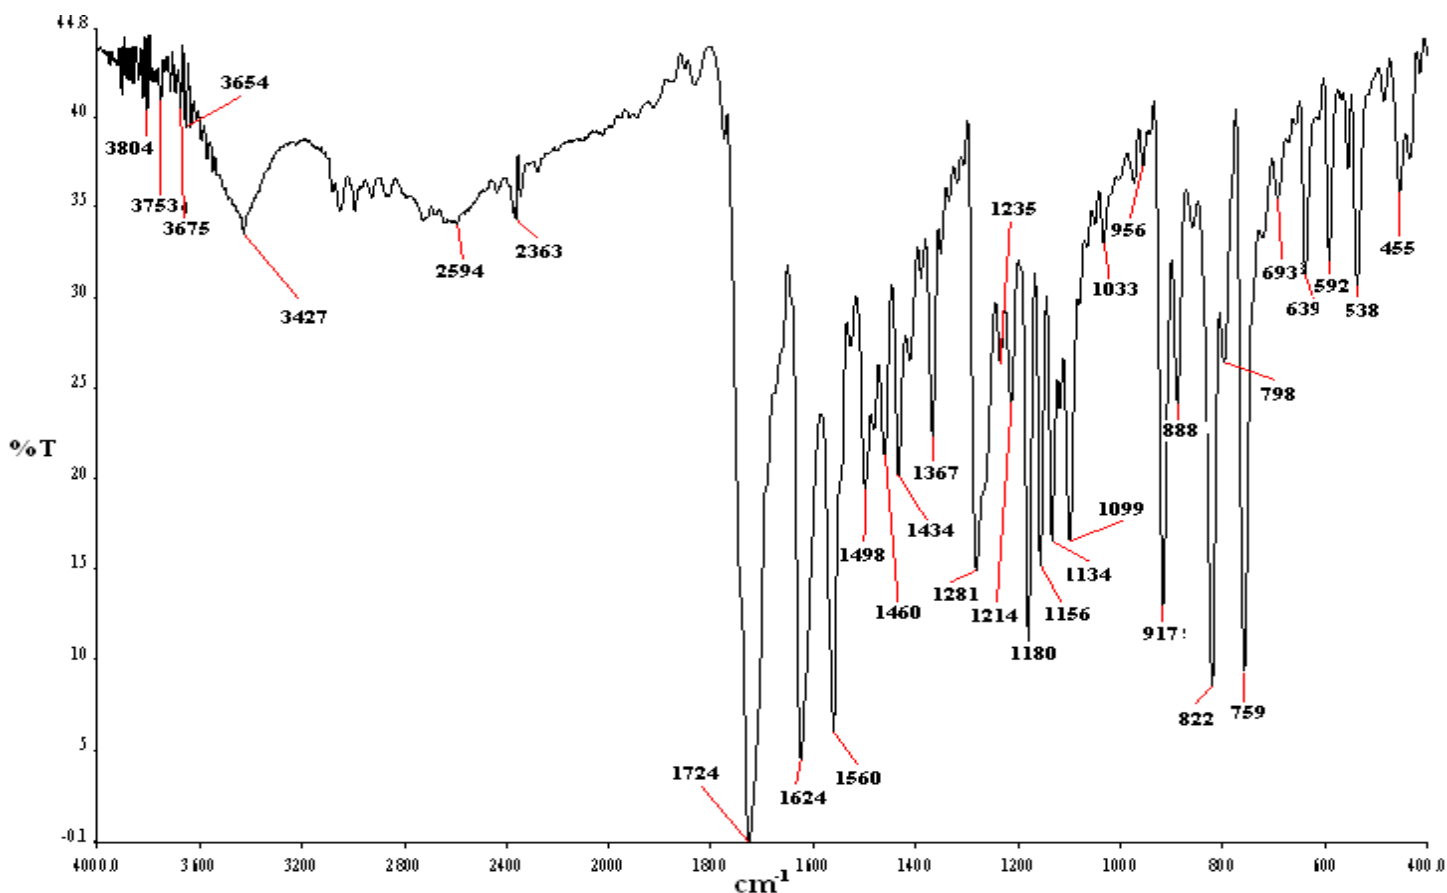

Fig. S1 FTIR spectrum of HBC.

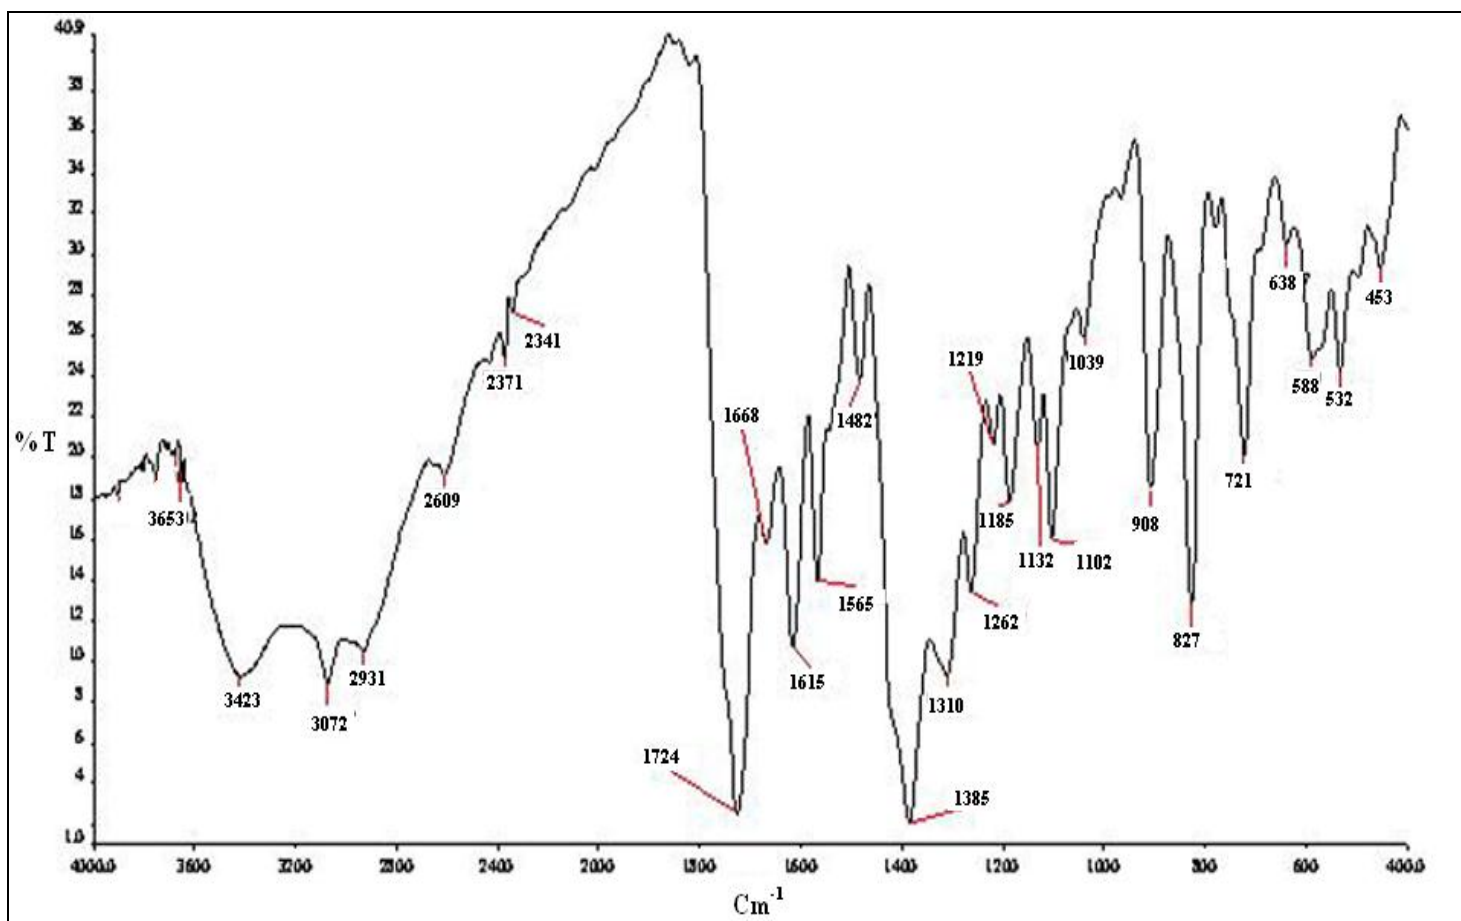

Fig. S2 FTIR spectrum of [Al(HBC)(MeOH)(NO<sub>3</sub>)<sub>3</sub>].

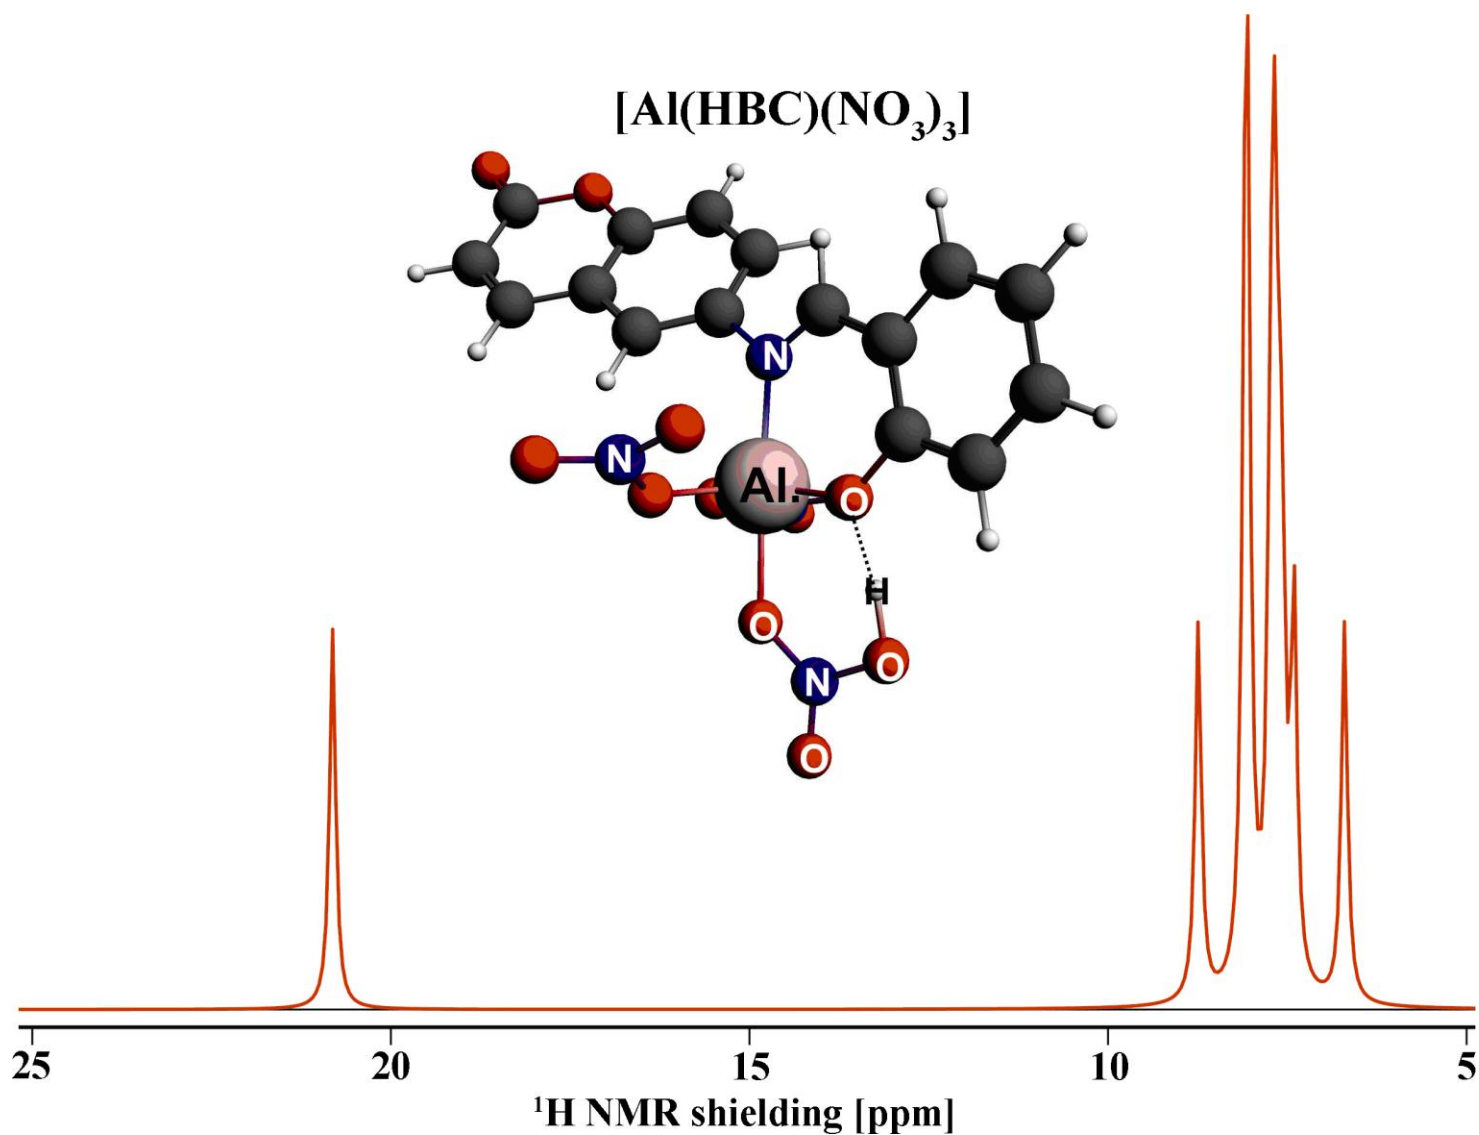

**Fig. S3** DFT optimized structure of [Al(HBC)(NO<sub>3</sub>)<sub>3</sub>] together with the calculated <sup>1</sup>H NMR spectrum based on GIAO approach as implemented in the ADF program. Values are provided with respect to TMS.

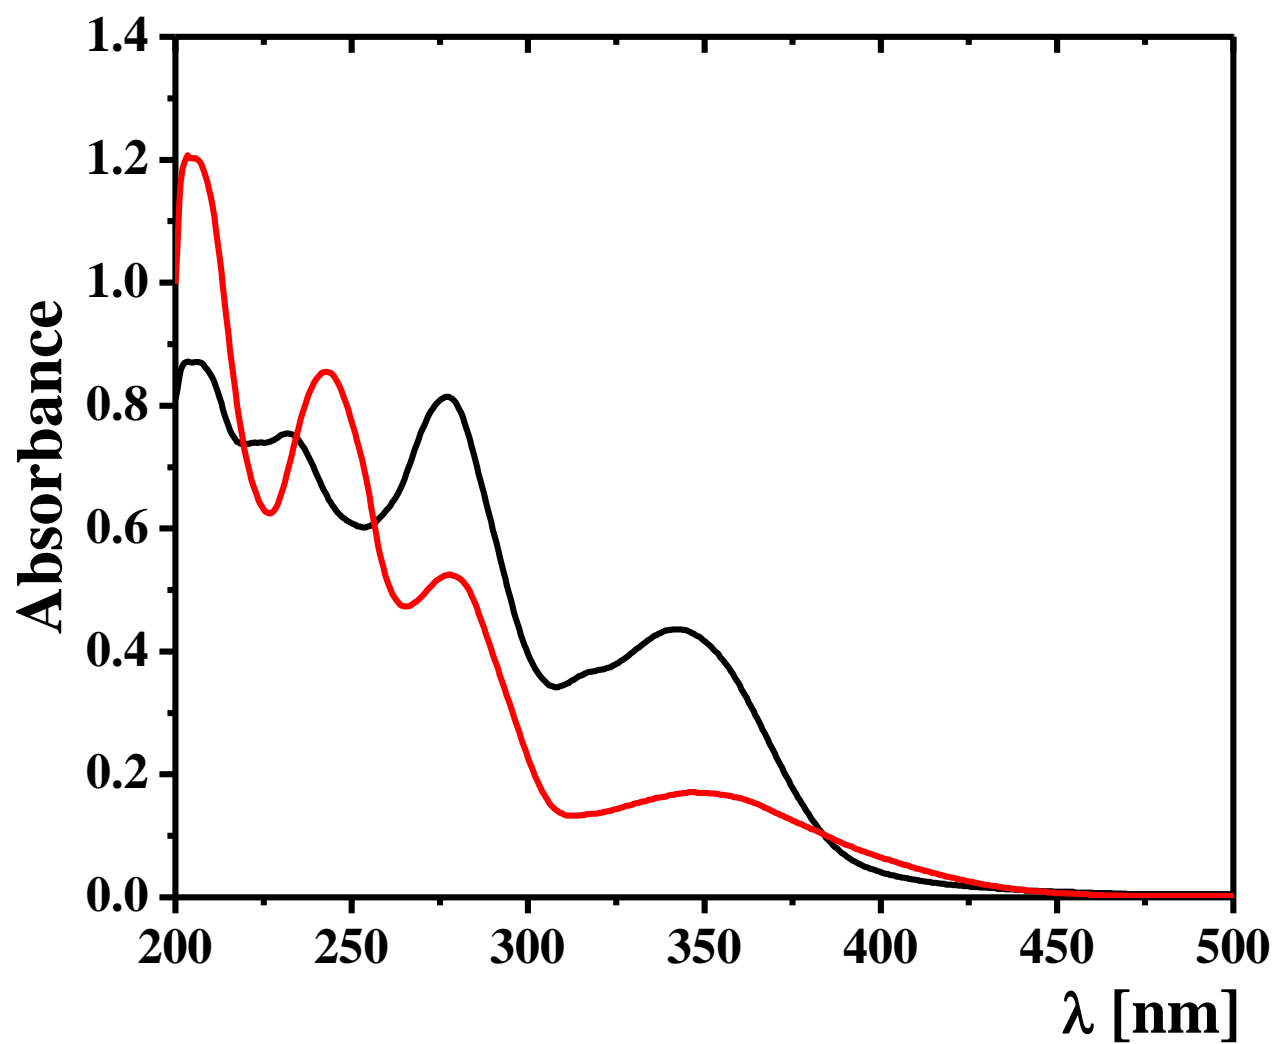

**Fig. S4** Absorption spectra of **HBC** (1 μM) and **[Al(HBC)(MeOH)(NO<sub>3</sub>)<sub>3</sub>]** in H<sub>2</sub>O:MeOH = 7:3 (v/v).

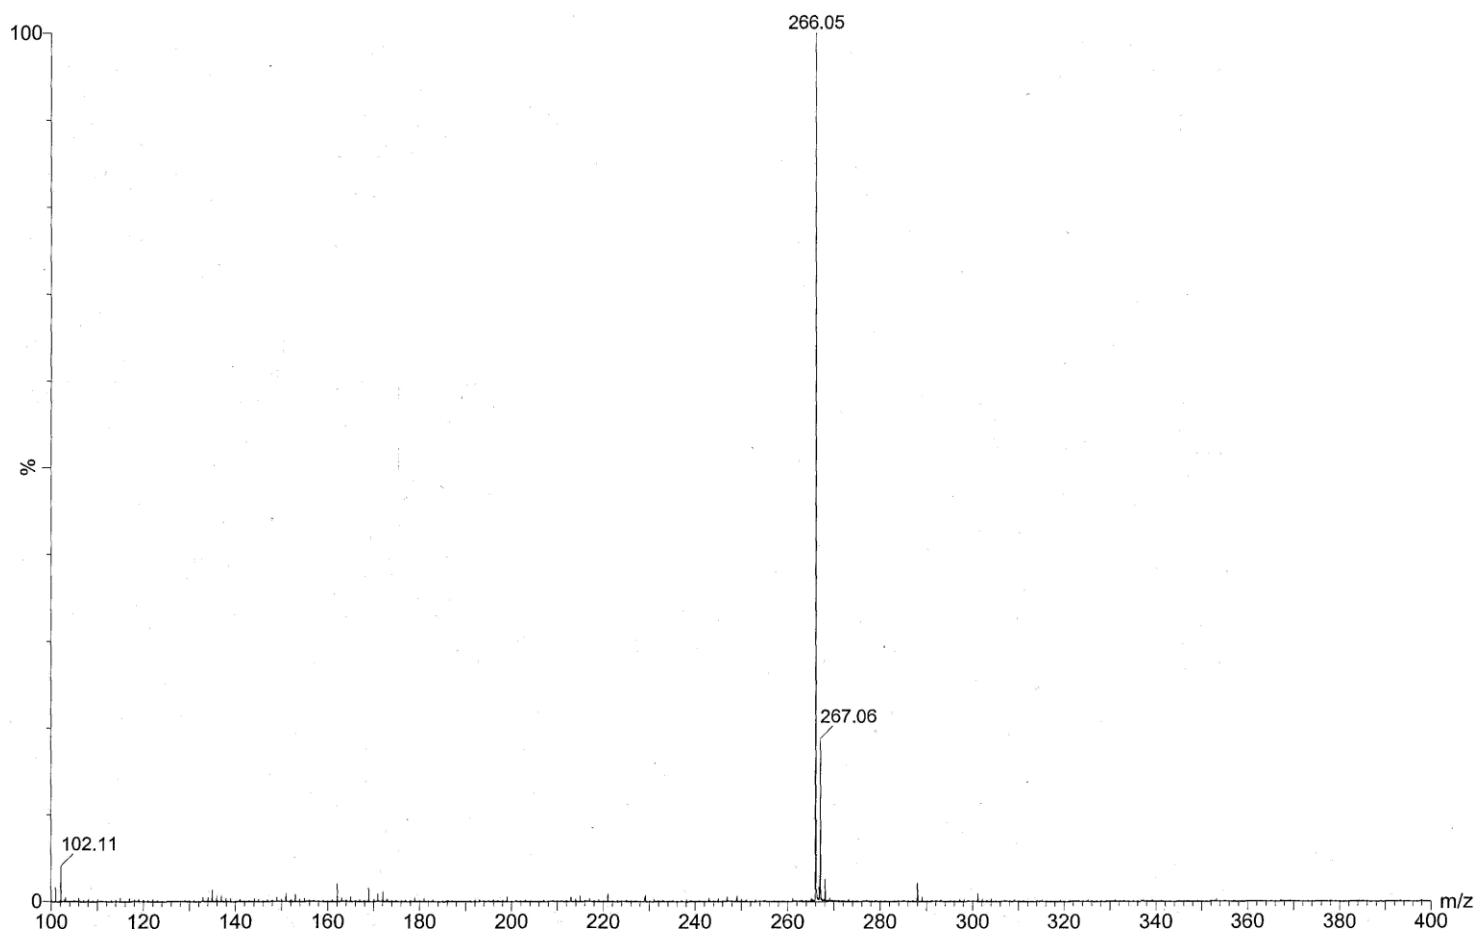

**Fig. S5** QTOF-MS ES<sup>+</sup> spectrum of **HBC**.

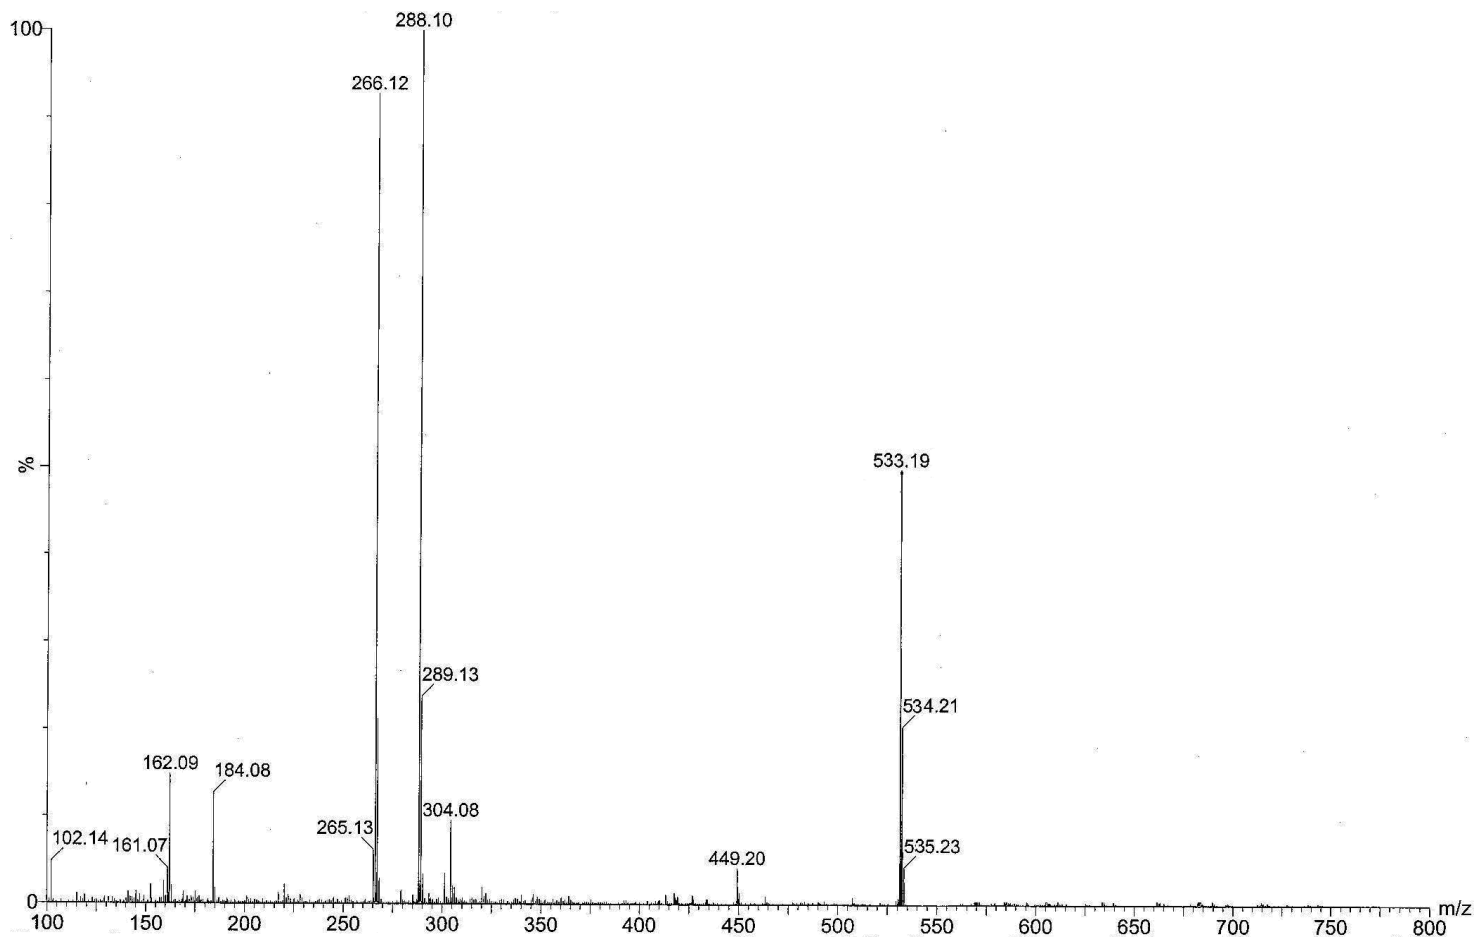

**Fig. S6** QTOF-MS ES<sup>+</sup> spectrum of [Al(HBC)(MeOH)(NO<sub>3</sub>)<sub>3</sub>].

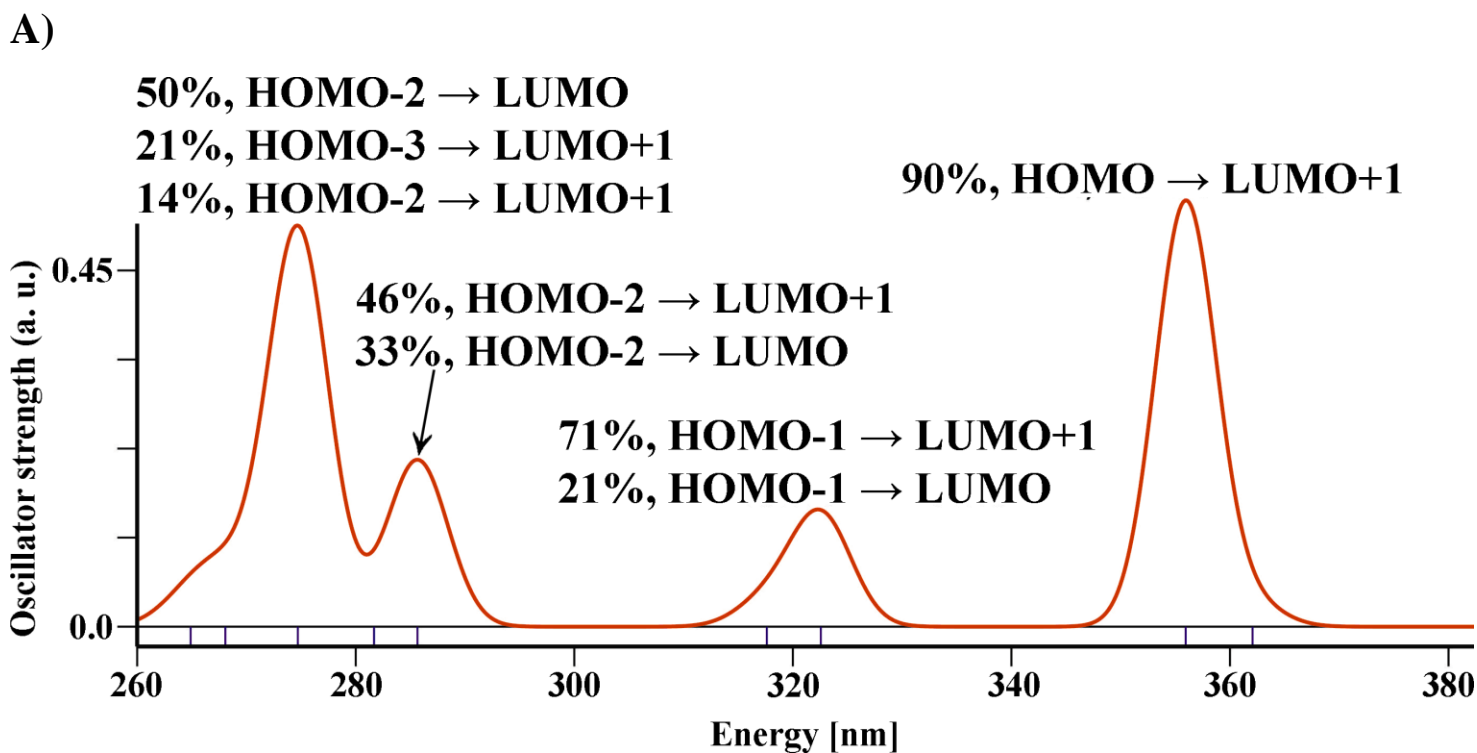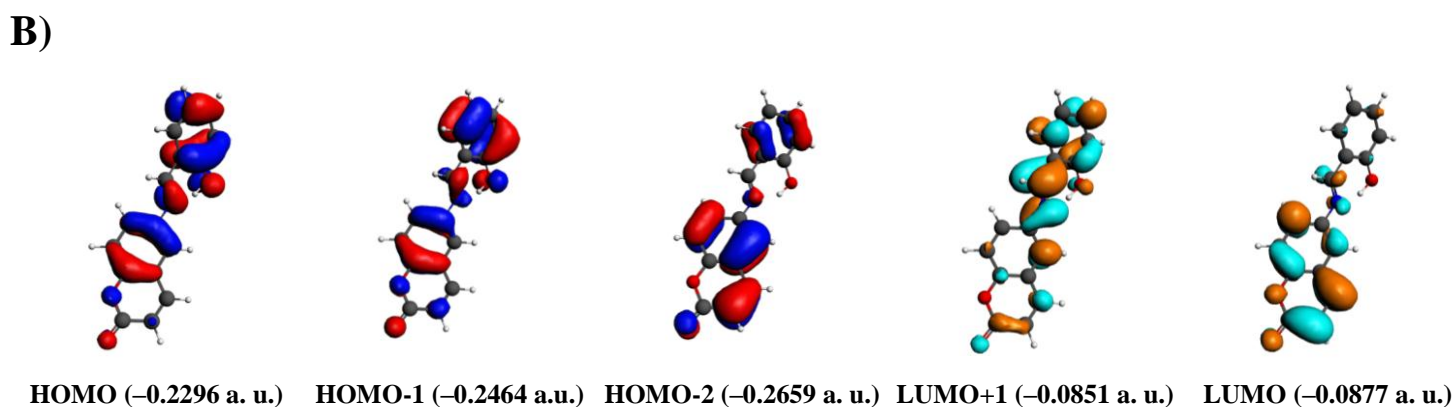

**Fig. S7** Simulated TD-DFT absorption spectrum (B3LYP/TZP, gas phase) of **HBC** (**A**) together with the contours of molecular orbitals involved in the dominant transitions (**B**).

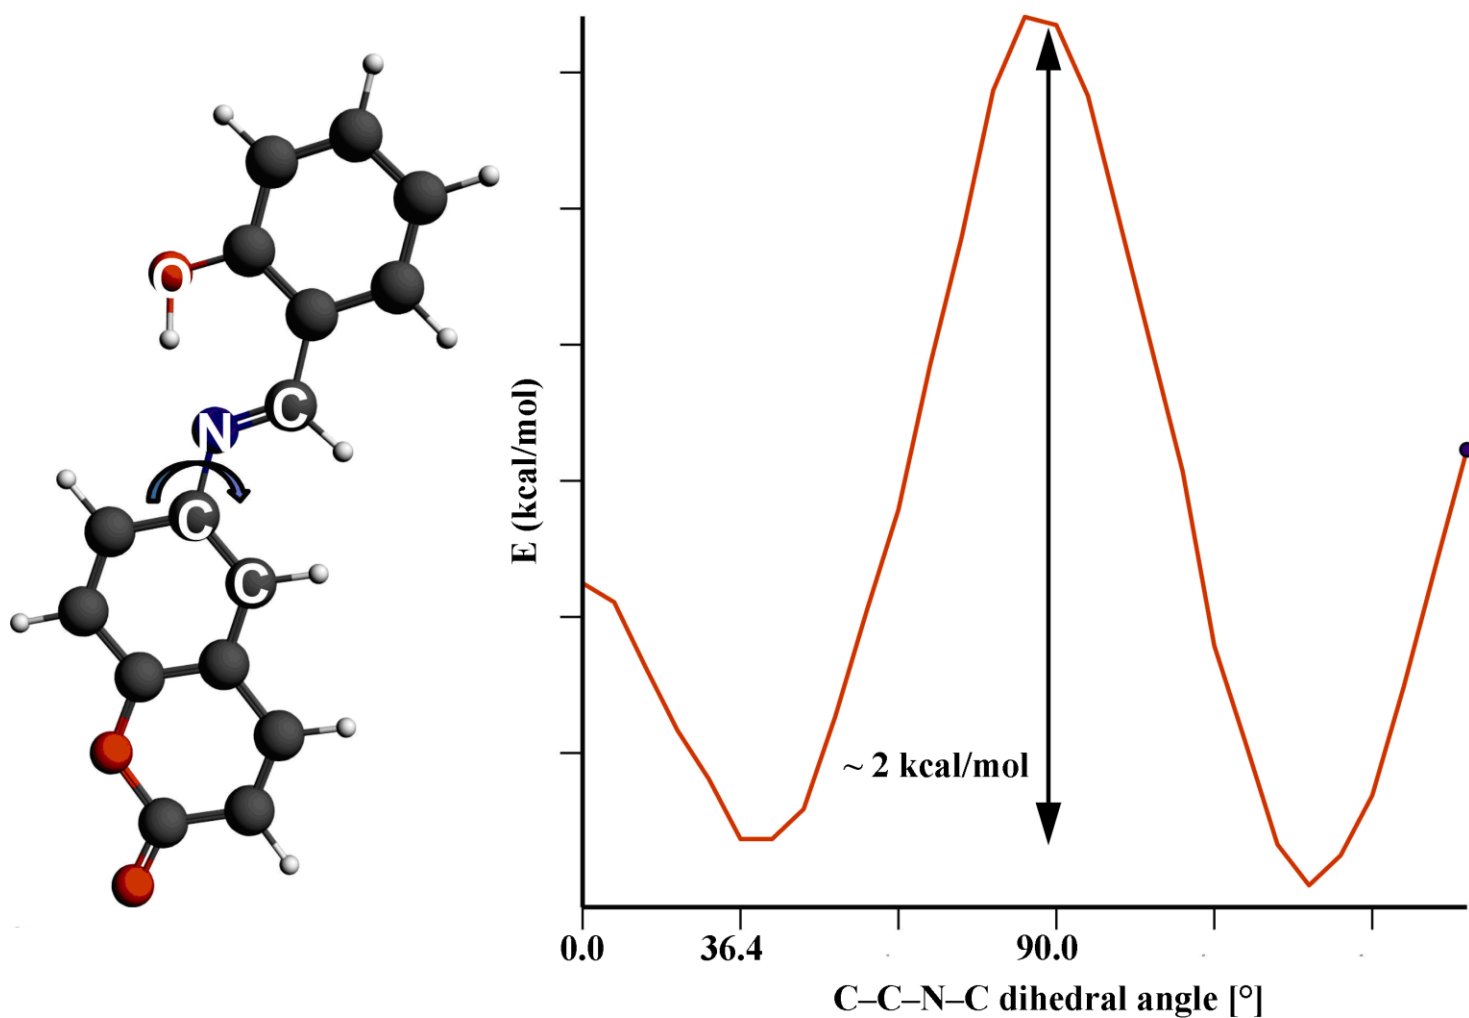

**Fig. S8** Energy profile for **HBC**, characterizing rotation around the middle C–N bond (DFT/TZP/BP86). It is clearly shown that the ground state of **HBC** adopts a twisted conformation ( $\angle\text{C–C–N–C} = 36.4^\circ$ ) and contains an intramolecular O–H $\cdots$ N hydrogen bond. Twisting is due to the repulsion between the N=C–H and H–C(coumarin).



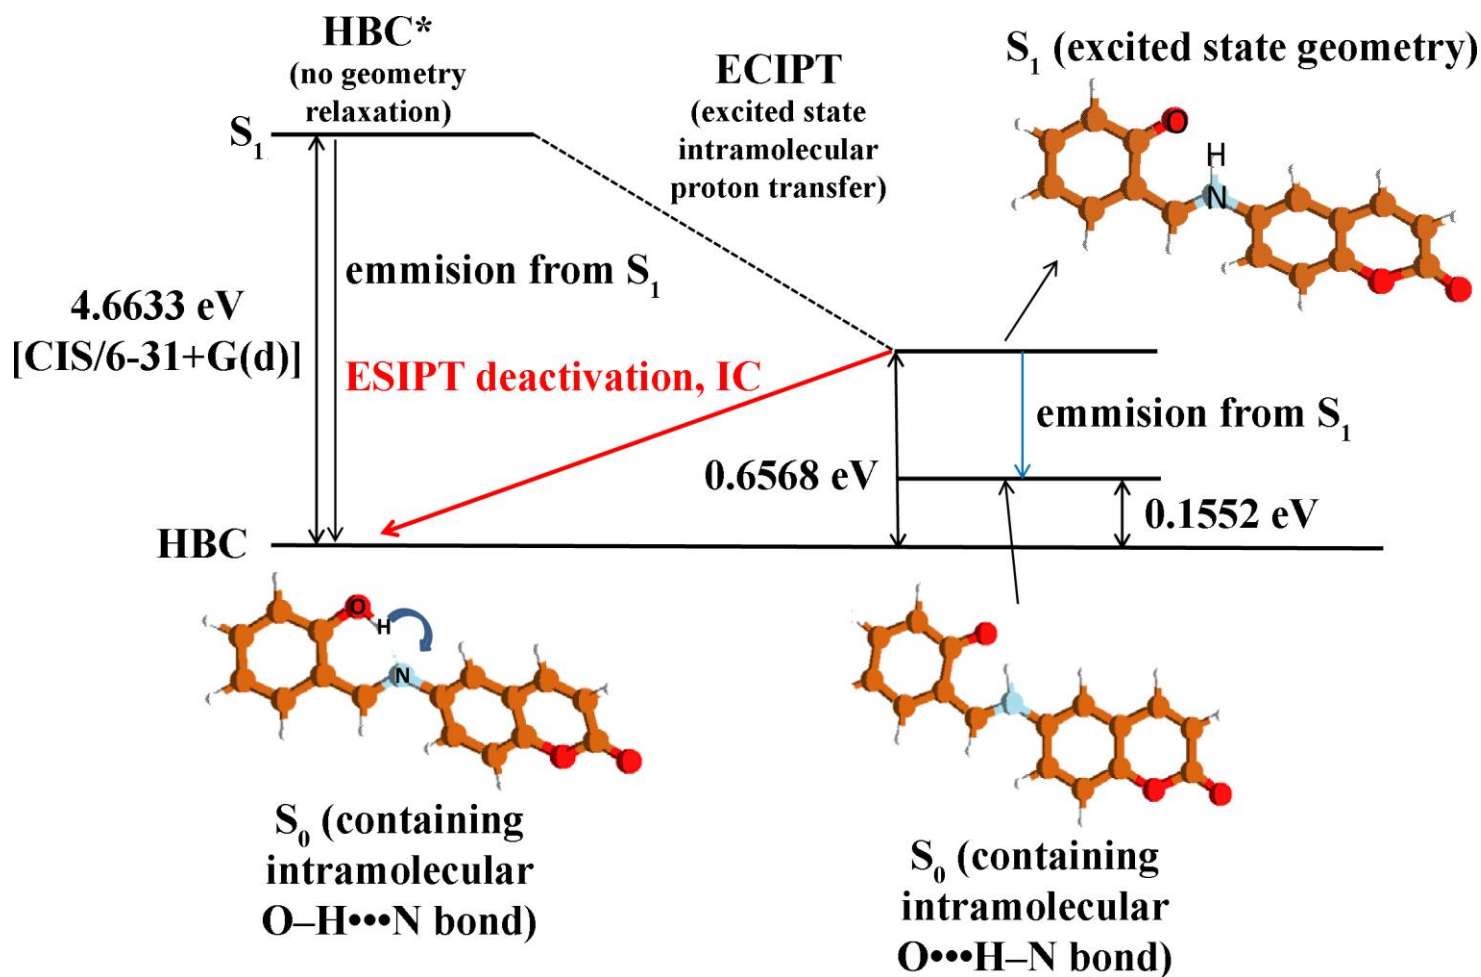

**Fig. S9** The four-states model of the absorption/emission processes in **HBC** based on the DFT/BP86/TZP calculation. Possible deactivation of the excited state S<sub>1</sub> *via* internal conversion pathway is highlighted in red color. In addition vertical S<sub>0</sub> → S<sub>1</sub> transition energy based on the CIS [6-31+G(d)] calculations is presented.

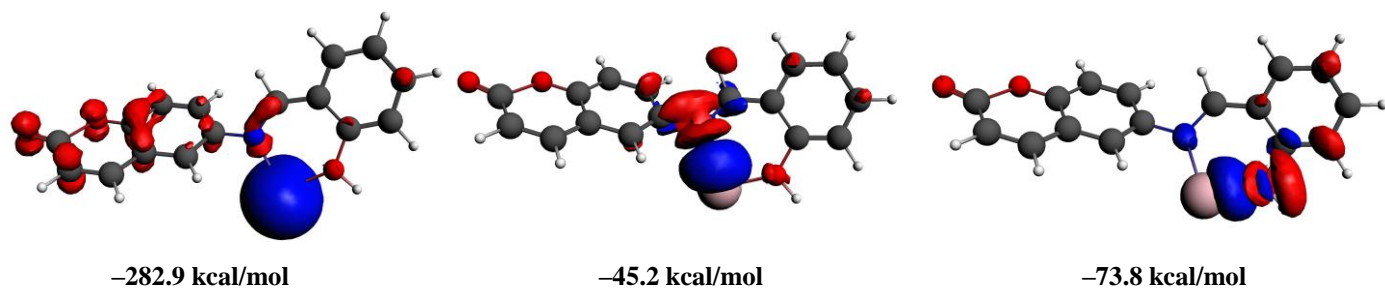

**Fig. S10** Dominating NOCV based deformation density channels, describing the interaction between  $\text{Al}^{3+}$  and HBC.

**Table S1** ETS-NOCV based results describing the interaction between cations  $M^{n+}$  and **HBC**

| $M^{n+}/ETS^a$     | $\Delta E_{total}$ | $\Delta E_{orb}$ | $\Delta E_{elstat}$ | $\Delta E_{Pauli}$ |
|--------------------|--------------------|------------------|---------------------|--------------------|
| Al <sup>3+</sup>   | -571.59            | -479.90          | -124.38             | 32.68              |
| Zn <sup>2+</sup>   | -248.26            | -194.18          | -107.99             | 53.91              |
| Cd <sup>2+</sup>   | -206.13            | -165.68          | -67.93              | 24.47              |
| Mg <sup>2+</sup>   | -186.10            | -152.46          | -87.29              | 53.66              |
| Ca <sup>2+</sup>   | -135.90            | -129.77          | -79.16              | 73.03              |
| Na <sup>+</sup>    | -37.89             | -22.25           | -32.58              | 16.95              |
| Pb <sup>2+</sup>   | -147.5             | -146.99          | -90.54              | 90.03              |
| Cu <sup>+</sup>    | -84.06             | -74.72           | -121.84             | 112.5              |
| K <sup>+</sup>     | -26.68             | -18.84           | -25.72              | 17.88              |
| Hg <sup>2+ b</sup> | —                  | —                | —                   | —                  |

<sup>a</sup>  $\Delta E_{total} = \Delta E_{orb} + \Delta E_{elstat} + \Delta E_{Pauli}$

<sup>b</sup> no minimum was found for the [**HBC**-Hg<sup>2+</sup>] complex

**Table S2** Selected bond lengths (Å) and bond angles (°) for **HBC**

| <b>Molecule A</b>   |          |                   |          | <b>Molecule B</b>  |          |                      |          |
|---------------------|----------|-------------------|----------|--------------------|----------|----------------------|----------|
| <i>Bond lengths</i> |          |                   |          |                    |          |                      |          |
| N(1)–C(1)           | 1.264(4) | C(4)–C(10)        | 1.421(5) | N(1A)–C(1A)        | 1.289(4) | C(4A)–C(10A)         | 1.425(4) |
| N(1)–C(2)           | 1.439(4) | C(5)–C(6)         | 1.379(5) | N(1A)–C(2A)        | 1.426(4) | C(5A)–C(6A)          | 1.378(5) |
| O(1)–C(12)          | 1.354(4) | C(6)–C(7)         | 1.381(5) | O(1A)–C(12A)       | 1.366(4) | C(6A)–C(7A)          | 1.383(5) |
| O(2)–C(5)           | 1.378(4) | C(8)–C(9)         | 1.454(4) | O(2A)–C(5A)        | 1.387(4) | C(8A)–C(9A)          | 1.443(5) |
| O(2)–C(8)           | 1.388(4) | C(9)–C(10)        | 1.356(5) | O(2A)–C(8A)        | 1.381(4) | C(9A)–C(10A)         | 1.354(5) |
| O(3)–C(8)           | 1.202(4) | C(11)–C(12)       | 1.406(4) | O(3A)–C(8A)        | 1.201(4) | C(11A)–C(12A)        | 1.404(4) |
| C(1)–C(11)          | 1.438(5) | C(11)–C(16)       | 1.410(5) | C(1A)–C(11A)       | 1.450(5) | C(11A)–C(16A)        | 1.390(5) |
| C(2)–C(3)           | 1.387(5) | C(12)–C(13)       | 1.397(5) | C(2A)–C(3A)        | 1.384(5) | C(12A)–C(13A)        | 1.381(5) |
| C(2)–C(7)           | 1.406(4) | C(13)–C(14)       | 1.369(5) | C(2A)–C(7A)        | 1.402(4) | C(13A)–C(14A)        | 1.386(5) |
| C(3)–C(4)           | 1.399(5) | C(14)–C(15)       | 1.404(5) | C(3A)–C(4A)        | 1.408(5) | C(14A)–C(15A)        | 1.399(5) |
| C(4)–C(5)           | 1.393(4) | C(15)–C(16)       | 1.382(5) | C(4A)–C(5A)        | 1.393(4) | C(15A)–C(16A)        | 1.390(5) |
| <i>Bond angles</i>  |          |                   |          |                    |          |                      |          |
| C(1)–N(1)–C(2)      | 121.0(3) | O(3)–C(8)–O(2)    | 116.7(3) | C(1A)–N(1A)–C(2A)  | 120.9(3) | O(3A)–C(8A)–O(2A)    | 116.1(3) |
| C(5)–O(2)–C(8)      | 121.4(3) | O(3)–C(8)–C(9)    | 125.7(4) | C(8A)–O(2A)–C(5A)  | 121.5(3) | O(3A)–C(8A)–C(9A)    | 126.4(3) |
| N(1)–C(1)–C(11)     | 121.6(3) | O(2)–C(8)–C(9)    | 117.6(3) | N(1A)–C(1A)–C(11A) | 122.2(3) | O(2A)–C(8A)–C(9A)    | 117.4(3) |
| C(3)–C(2)–C(7)      | 119.9(3) | C(10)–C(9)–C(8)   | 120.0(3) | C(3A)–C(2A)–C(7A)  | 119.9(3) | C(10A)–C(9A)–C(8A)   | 120.9(3) |
| C(3)–C(2)–N(1)      | 116.2(3) | C(9)–C(10)–C(4)   | 121.5(3) | C(3A)–C(2A)–N(1A)  | 115.7(3) | C(9A)–C(10A)–C(4A)   | 121.3(3) |
| C(7)–C(2)–N(1)      | 123.9(3) | C(12)–C(11)–C(16) | 117.7(3) | C(7A)–C(2A)–N(1A)  | 124.4(3) | C(16A)–C(11A)–C(12A) | 118.7(3) |
| C(2)–C(3)–C(4)      | 120.7(3) | C(12)–C(11)–C(1)  | 121.9(3) | C(2A)–C(3A)–C(4A)  | 120.5(3) | C(16A)–C(11A)–C(1A)  | 119.1(3) |
| C(5)–C(4)–C(3)      | 118.1(3) | C(16)–C(11)–C(1)  | 120.4(3) | C(5A)–C(4A)–C(3A)  | 118.1(3) | C(12A)–C(11A)–C(1A)  | 122.1(3) |
| C(5)–C(4)–C(10)     | 118.0(3) | O(1)–C(12)–C(13)  | 118.9(3) | C(5A)–C(4A)–C(10A) | 117.4(3) | O(1A)–C(12A)–C(13A)  | 119.2(3) |
| C(3)–C(4)–C(10)     | 123.9(3) | O(1)–C(12)–C(11)  | 121.1(3) | C(3A)–C(4A)–C(10A) | 124.5(3) | O(1A)–C(12A)–C(11A)  | 120.8(3) |
| O(2)–C(5)–C(6)      | 116.9(3) | C(13)–C(12)–C(11) | 120.0(3) | C(6A)–C(5A)–O(2A)  | 116.7(3) | C(13A)–C(12A)–C(11A) | 120.0(3) |
| O(2)–C(5)–C(4)      | 121.3(3) | C(14)–C(13)–C(12) | 120.3(4) | C(6A)–C(5A)–C(4A)  | 121.8(3) | C(12A)–C(13A)–C(14A) | 120.5(3) |
| C(6)–C(5)–C(4)      | 121.7(3) | C(13)–C(14)–C(15) | 121.8(3) | O(2A)–C(5A)–C(4A)  | 121.4(3) | C(13A)–C(14A)–C(15A) | 120.6(3) |
| C(5)–C(6)–C(7)      | 120.0(3) | C(16)–C(15)–C(14) | 117.3(4) | C(5A)–C(6A)–C(7A)  | 119.7(3) | C(16A)–C(15A)–C(14A) | 118.3(3) |
| C(6)–C(7)–C(2)      | 119.6(3) | C(15)–C(16)–C(11) | 122.8(4) | C(6A)–C(7A)–C(2A)  | 120.0(3) | C(11A)–C(16A)–C(15A) | 121.9(3) |

**Table S3** Hydrogen bond lengths (Å) and angles (°) for **HBC**

|                   | D–H···A             | d(D–H)    | d(H···A) | d(D···A) | ∠(DHA) |
|-------------------|---------------------|-----------|----------|----------|--------|
| <b>Molecule A</b> | O(1)–H(1)···N(1)    | 0.825(10) | 1.87(2)  | 2.590(4) | 145(4) |
| <b>Molecule B</b> | O(1A)–H(1A)···N(1A) | 0.831(10) | 1.85(2)  | 2.616(4) | 152(4) |

**Table S4** ETS energy decomposition based results, describing the interaction between two planar **HBC** units from the crystal structure (BP86-D3/TZ2P method)

| $\Delta E_{\text{total}}^a$ | $\Delta E_{\text{orb}}$ | $\Delta E_{\text{elstat}}$ | $\Delta E_{\text{Pauli}}$ | $\Delta E_{\text{dispersion}}$ |
|-----------------------------|-------------------------|----------------------------|---------------------------|--------------------------------|
| -11.42                      | -3.09                   | -3.72                      | 10.59                     | -15.2                          |

<sup>a</sup>  $\Delta E_{\text{total}} = \Delta E_{\text{orb}} + \Delta E_{\text{elstat}} + \Delta E_{\text{Pauli}} + \Delta E_{\text{dispersion}}$

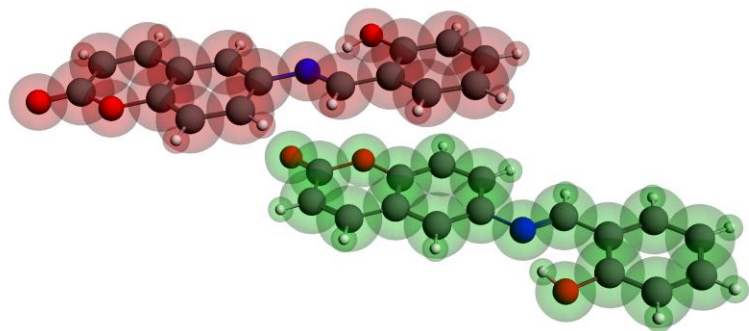

Supplement: c3dt51045j.pdf [file c3dt51045j.pdf]
